# Supplementary material for: Tumor suppressor effects of miR-143 and miR-199 on myelogenous leukemia cells through targeting RNA-binding protein Musashi2
Source: Research Square preprint supplement (doi:10.21203/rs.3.rs-7471306/v1), 2025-11-24
Supplement: Supplementary file 1 [file d3a638faaa320f770a27ec72.pdf]

(A) Western blot of MSI2

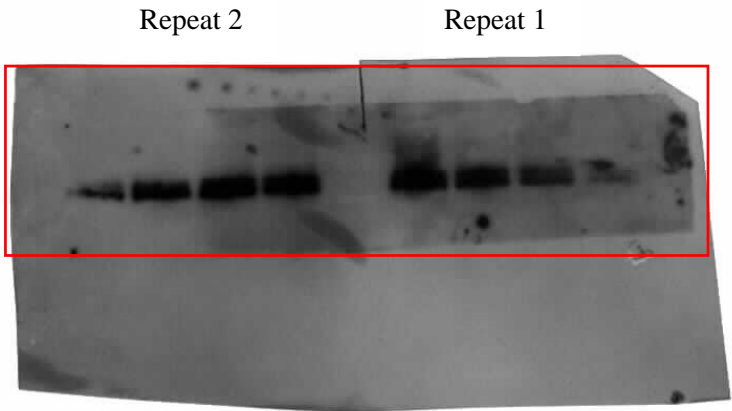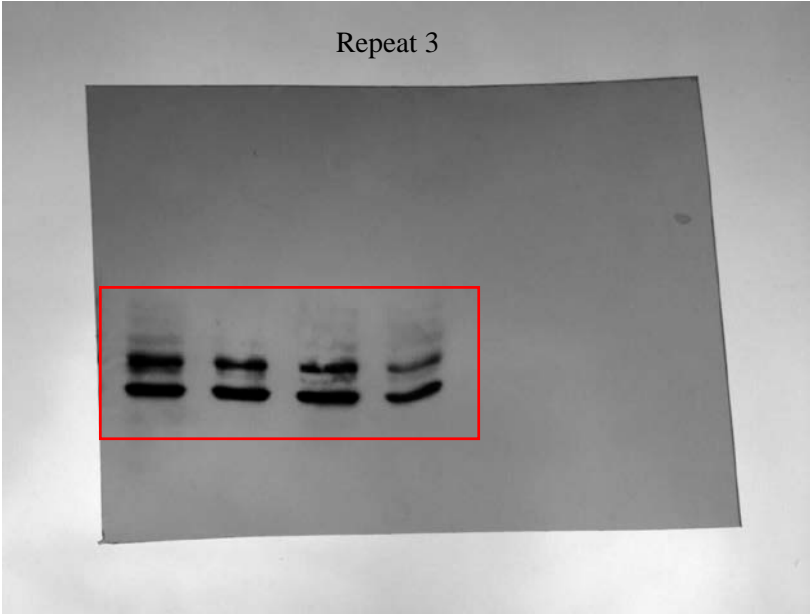

Repeat 1

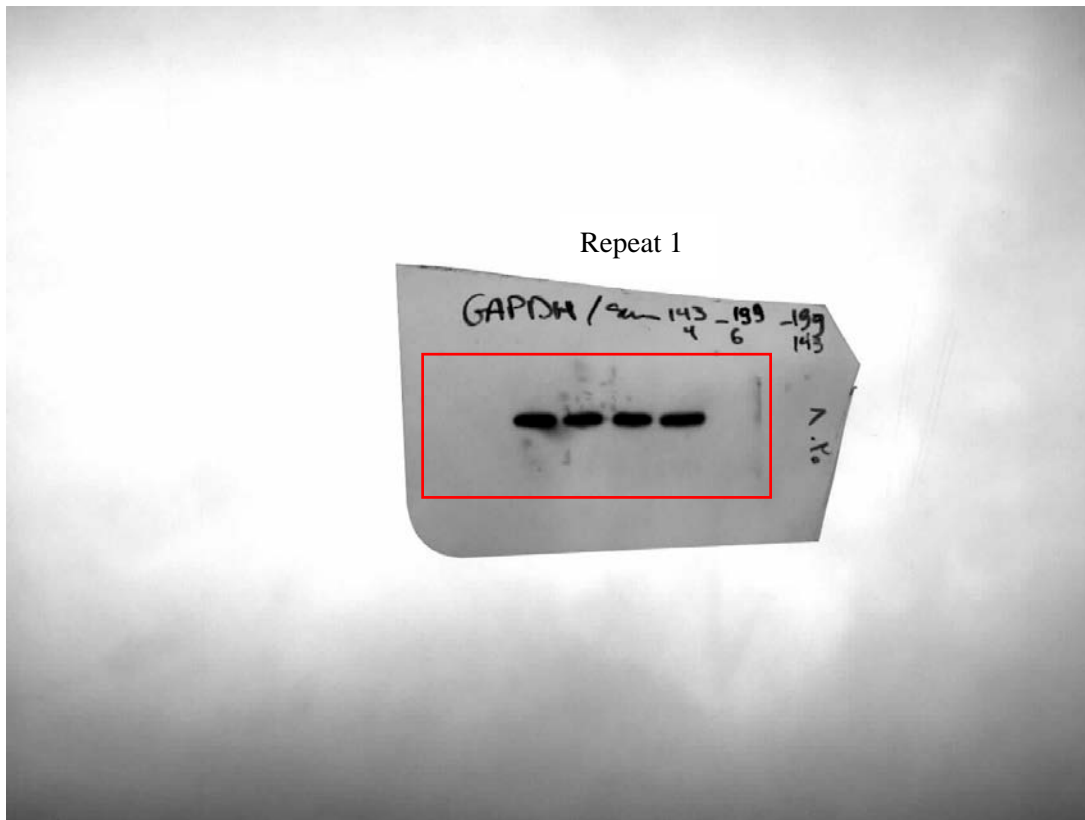

Repeat 2

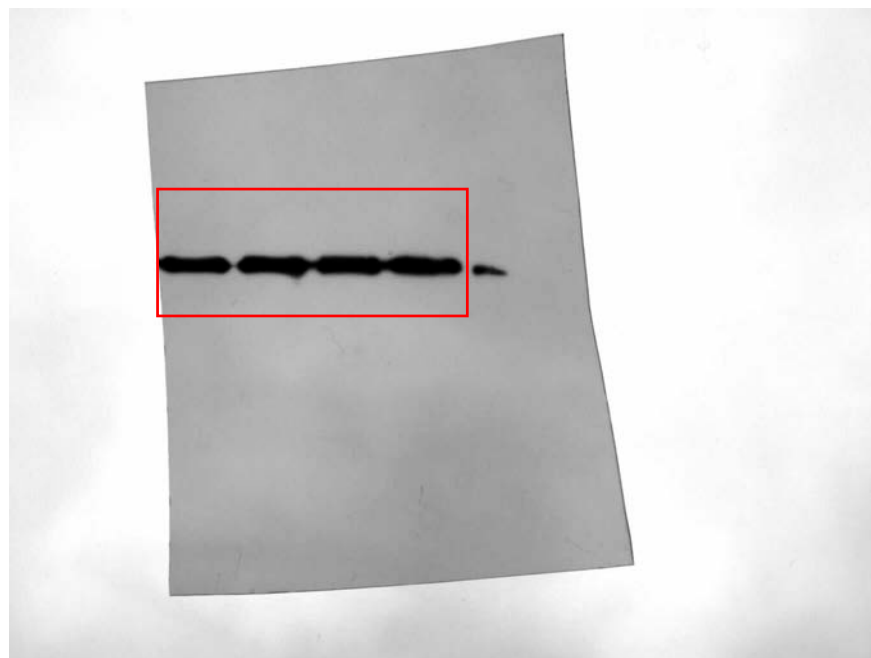

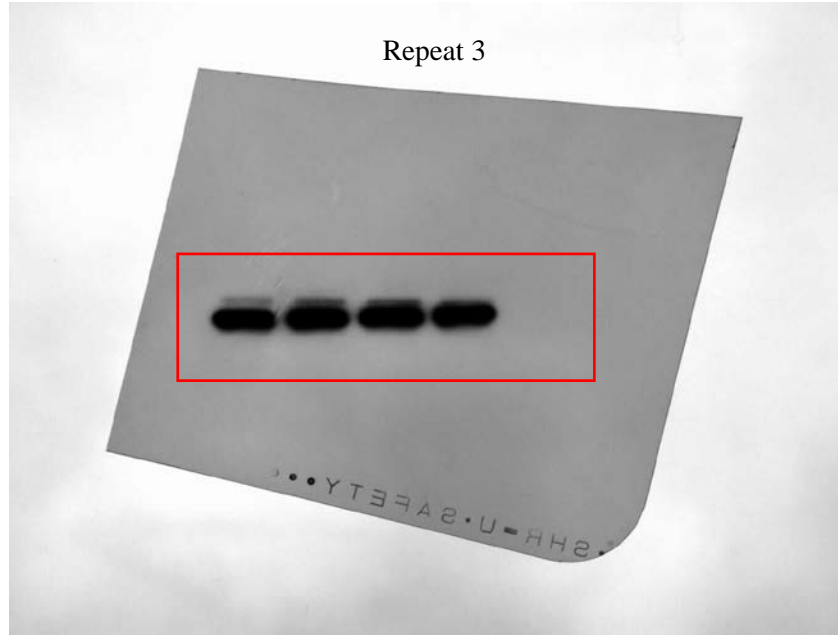

Fig. 5: The expression levels of MSI2 after overexpression of miR-143-3p or miR-199a-3p in K562 cells. (A) The mRNA levels of MSI2 were reduced in K562 cells stably transfected with miRNA precursors ( $*p < 0.05$ ). (B) The protein expression levels of MSI2 were analyzed in stably transfected K562 cells using western blotting. The data were normalized to GAPDH as an internal control and quantified with ImageJ software (version 1.42q) ( $*p < 0.05$ ,  $**p < 0.05$ ). Scr: Scramble.
